# Supplementary material for: Continuing education for the chiropractic profession: a cross-sectional study analyzing potential barriers to future chiropractic academic and research development
Source: Chiropr Man Therap. 2025 Aug 21;33:34. doi: 10.1186/s12998-025-00596-x (PMC12372364; doi:10.1186/s12998-025-00596-x)
Supplement: Supplementary file 1 — Supplementary Material 1 [file 12998_2025_596_MOESM1_ESM.xlsx]

## Sheet: Sup A
Supplementary Table A - Allowance of CE credit for Research and Teaching by State and Profession
	DC		MD		DO		AT		PT
State	Research	Teaching	Research	Teaching	Research	Teaching	Research	Teaching	Research	Teaching
Alabama	Y	N	Y	Y	Y	Y	Y	Y	Y	Y
Alaska	Y	Y	Y	Y	Y	Y	Y	Y	N	N
Arizona	N	Y	Y	Y	Y	Y	Y	Y	Y	Y
Arkansas	N	N	Y	Y	Y	Y	Y	Y	Y	N
California	N	Y	Y	Y	Y	Y	Y	Y	Y	Y
Colorado	N	Y	NA	NA	NA	NA	Y	Y	Y	Y
Connecticut	Y	Y	Y	Y	Y	Y	Y	Y	N	N
Delaware	N	N	Y	Y	Y	Y	Y	Y	Y	Y
District of Columbia	N	N	Y	Y	Y	Y	Y	Y	Y	Y
Florida	N	Y	Y	Y	Y	Y	Y	Y	N	Y
Georgia	N	Y	Y	Y	Y	Y	Y	Y	Y	Y
Hawaii	N	N	Y	Y	Y	Y	Y	Y	Y	Y
Idaho	N	N	Y	Y	Y	Y	Y	Y	Y	Y
Illinois	Y	Y	Y	Y	Y	Y	Y	Y	Y	Y
Indiana	N	N	NA	NA	NA	NA	Y	Y	N	N
Iowa	N	Y	Y	Y	Y	Y	Y	Y	Y	Y
Kansas	Y	Y	Y	Y	Y	Y	Y	Y	Y	Y
Kentucky	N	N	Y	Y	Y	Y	Y	Y	Y	Y
Louisiana	N	N	Y	Y	Y	Y	Y	Y	Y	Y
Maine	Y	Y	Y	Y	Y	Y	Y	Y	NA	NA
Maryland	N	Y	Y	Y	Y	Y	Y	Y	Y	Y
Massachusetts	N	Y	Y	Y	Y	Y	Y	Y	Y	Y
Michigan	Y	N	Y	Y	Y	Y	Y	Y	Y	Y
Minnesota	N	Y	Y	Y	Y	Y	Y	Y	Y	Y
Mississippi	N	N	Y	Y	Y	Y	Y	Y	Y	Y
Missouri	Y	Y	Y	Y	Y	Y	Y	Y	Y	Y
Montana	Y	Y	NA	NA	NA	NA	Y	Y	Y	Y
Nebraska	Y	Y	Y	Y	Y	Y	Y	Y	Y	Y
Nevada	N	N	Y	Y	Y	Y	Y	Y	Y	Y
New Hampshire	N	N	Y	Y	Y	Y	Y	Y	Y	Y
New Jersey	Y	Y	Y	Y	Y	Y	Y	Y	Y	Y
New Mexico	N	N	Y	Y	Y	Y	Y	Y	Y	Y
New York	N	Y	NA	NA	NA	NA	Y	Y	Y	Y
North Carolina	Y	N	Y	Y	Y	Y	Y	Y	Y	Y
North Dakota	N	N	Y	Y	Y	Y	Y	Y	N	Y
Ohio	Y	Y	Y	Y	Y	Y	Y	Y	Y	Y
Oklahoma	N	N	Y	Y	Y	Y	Y	Y	Y	Y
Oregon	Y	Y	Y	Y	Y	Y	Y	Y	Y	Y
Pennsylvania	N	N	Y	Y	Y	Y	Y	Y	Y	Y
Puerto Rico	N	Y	Y	Y	Y	Y	Y	Y	N	N
Rhode Island	N	N	Y	Y	Y	Y	Y	Y	Y	Y
South Carolina	N	Y	Y	Y	Y	Y	Y	Y	Y	Y
South Dakota	N	N	NA	NA	NA	NA	Y	Y	Y	Y
Tennessee	N	N	Y	Y	Y	Y	Y	Y	Y	Y
Texas	N	N	Y	Y	Y	Y	Y	Y	Y	Y
Utah	N	N	Y	Y	Y	Y	Y	Y	Y	Y
Vermont	Y	N	Y	Y	Y	Y	Y	Y	N	N
Virginia	Y	Y	Y	Y	Y	Y	Y	Y	Y	Y
Washington	N	Y	Y	Y	Y	Y	Y	Y	Y	Y
West Virginia	N	N	Y	Y	Y	Y	Y	Y	N	Y
Wisconsin	N	Y	Y	Y	Y	Y	Y	Y	Y	Y
Wyoming	N	N	Y	Y	Y	Y	Y	Y	Y	Y
Total States	16	26	47	47	47	47	52	52	43	45
NA is used to denote states that do not require CE credit
