# Supplementary material for: Continuing education for the chiropractic profession: a cross-sectional study analyzing potential barriers to future chiropractic academic and research development
Source: Chiropr Man Therap. 2025 Aug 21;33:34. doi: 10.1186/s12998-025-00596-x (PMC12372364; doi:10.1186/s12998-025-00596-x)
Supplement: Supplementary file 2 — Supplementary Material 2 [file 12998_2025_596_MOESM2_ESM.xlsx]

## Sheet: Sheet1
Supplementary Table C - Required CE Hours by State and Profession*
State	DC	MD	DO	AT	PT
Alabama	18	25	25	25	10
Alaska	16	25	25	25	12
Arizona	12	20	20	25	10
Arkansas	24	20	20	25	10
California	24	25	50	25	15
Colorado	15	0	0	25	15
Connecticut	24	25	25	25	20
Delaware	12	20	20	25	15
District of Columbia	15	25	25	25	20
Florida	20	20	20	25	12
Georgia	20	20	20	25	15
Hawaii	12	20	20	25	15
Idaho	12	20	20	25	16
Illinois	50	50	50	25	20
Indiana	12	0	0	25	11
Iowa	18	20	20	25	20
Kansas	33.33	50	43	25	20
Kentucky	12	20	20	25	15
Louisiana	15	20	20	25	15
Maine	24	20	50	25	0
Maryland	24	25	25	25	15
Massachusetts	12	50	50	25	12
Michigan	15	50	50	25	12
Minnesota	20	25	25	25	10
Mississippi	12	20	20	25	15
Missouri	24	25	25	25	15
Montana	12	0	0	25	15
Nebraska	18	25	25	25	10
Nevada	18	20	35	25	15
New Hampshire	20	50	50	25	15
New Jersey	15	50	50	25	12
New Mexico	16	25	25	25	15
New York	12	0	0	25	12
North Carolina	18	20	20	25	15
North Dakota	20	20	20	25	12.5
Ohio	18	25	25	25	12
Oklahoma	16	20	16	25	20
Oregon	20	30	30	25	12
Pennsylvania	12	50	16	25	15
Puerto Rico	15	20	20	25	10
Rhode Island	20	20	20	25	12
South Carolina	18	20	50	25	15
South Dakota	20	0	0	25	15
Tennessee	24	20	20	25	15
Texas	16	24	24	25	15
Utah	20	20	20	25	20
Vermont	12	15	15	25	12
Virginia	30	30	30	25	15
Washington	25	50	50	25	16
West Virginia	18	25	16	25	12
Wisconsin	20	15	15	25	15
Wyoming	12	20	20	25	15
Mean ± SD	18.5 ± 6.7	26.7 ± 11.1	27.7 ± 12.0	25 ± 0	14.5 ± 3.5
*Presented as per year equivalent (Total Hours/Renewal Period)
