# Supplementary material for: Continuing education for the chiropractic profession: a cross-sectional study analyzing potential barriers to future chiropractic academic and research development
Source: Chiropr Man Therap. 2025 Aug 21;33:34. doi: 10.1186/s12998-025-00596-x (PMC12372364; doi:10.1186/s12998-025-00596-x)
Supplement: Supplementary file 3 — Supplementary Material 3 [file 12998_2025_596_MOESM3_ESM.xlsx]

## Sheet: Sub B
Supplementary Table B - Allowance of CE credit by type of Research, Teaching, and State for DCs
State	Research (Any form)	Scientific Publication	Scientific Peer-Review	Teaching (Any form)	University Instruction	CE Instruction
Alabama	Y	Y	N	N	N	N
Alaska	Y	Y	N	Y	Y	Y
Arizona	N	N	N	Y	N	N
Arkansas	N	N	N	N	N	N
California	N	N	N	Y	Y	Y
Colorado	N	N	N	Y	N	Y
Connecticut	Y	Y	N	Y	Y	Y
Delaware	N	N	N	N	N	N
District of Columbia	N	N	N	N	N	N
Florida	N	N	N	Y	N	Y
Georgia	N	N	N	Y	Y	N
Hawaii	N	N	N	N	N	N
Idaho	N	N	N	N	N	N
Illinois	Y	Y	Y	Y	Y	Y
Indiana	N	N	N	N	N	N
Iowa	N	N	N	Y	Y	Y
Kansas	Y	Y	Y	Y	Y	Y
Kentucky	N	N	N	N	N	N
Louisiana	N	N	N	N	N	N
Maine	Y	Y	N	Y	Y	Y
Maryland	N	N	N	Y	Y	Y
Massachusetts	N	N	N	Y	Y	Y
Michigan	Y	Y	Y	N	N	N
Minnesota	N	N	N	Y	Y	N
Mississippi	N	N	N	N	N	N
Missouri	Y	Y	N	Y	Y	Y
Montana	Y	Y	N	Y	Y	Y
Nebraska	Y	Y	Y	Y	N	Y
Nevada	N	N	N	N	N	N
New Hampshire	N	N	N	N	N	N
New Jersey	Y	Y	N	Y	Y	Y
New Mexico	N	N	N	N	N	N
New York	N	N	N	Y	N	Y
North Carolina	Y	Y	Y	N	N	N
North Dakota	N	N	N	N	N	N
Ohio	Y	Y	N	Y	Y	Y
Oklahoma	N	N	N	N	N	N
Oregon	Y	Y	N	Y	Y	Y
Pennsylvania	N	N	N	N	N	N
Puerto Rico	N	N	N	Y	N	Y
Rhode Island	N	N	N	N	N	N
South Carolina	N	N	N	Y	Y	Y
South Dakota	N	N	N	N	N	N
Tennessee	N	N	N	N	N	N
Texas	N	N	N	N	N	N
Utah	N	N	N	N	N	N
Vermont	Y	N	Y	N	N	N
Virginia	Y	Y	Y	Y	Y	N
Washington	N	N	N	Y	N	Y
West Virginia	N	N	N	N	N	N
Wisconsin	N	N	N	Y	N	Y
Wyoming	N	N	N	N	N	N
Total States	16	15	7	26	18	22
